# Supplementary figures and images for: The Spike D614G mutation increases SARS-CoV-2 infection of multiple human cell types
Source: eLife journal article supplement (doi:10.7554/elife.65365), 2021-02-11

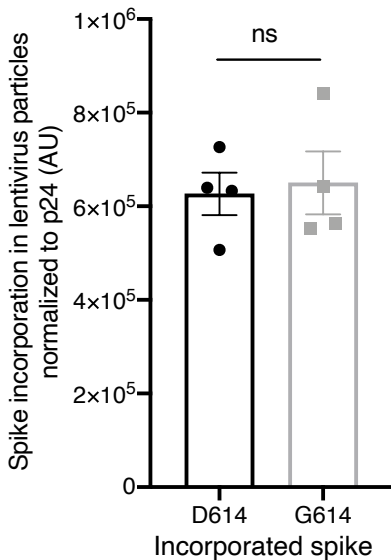

**Figure 3-figure supplement 1**

Supplement: supp [file elife-65365-supp-v1.zip]

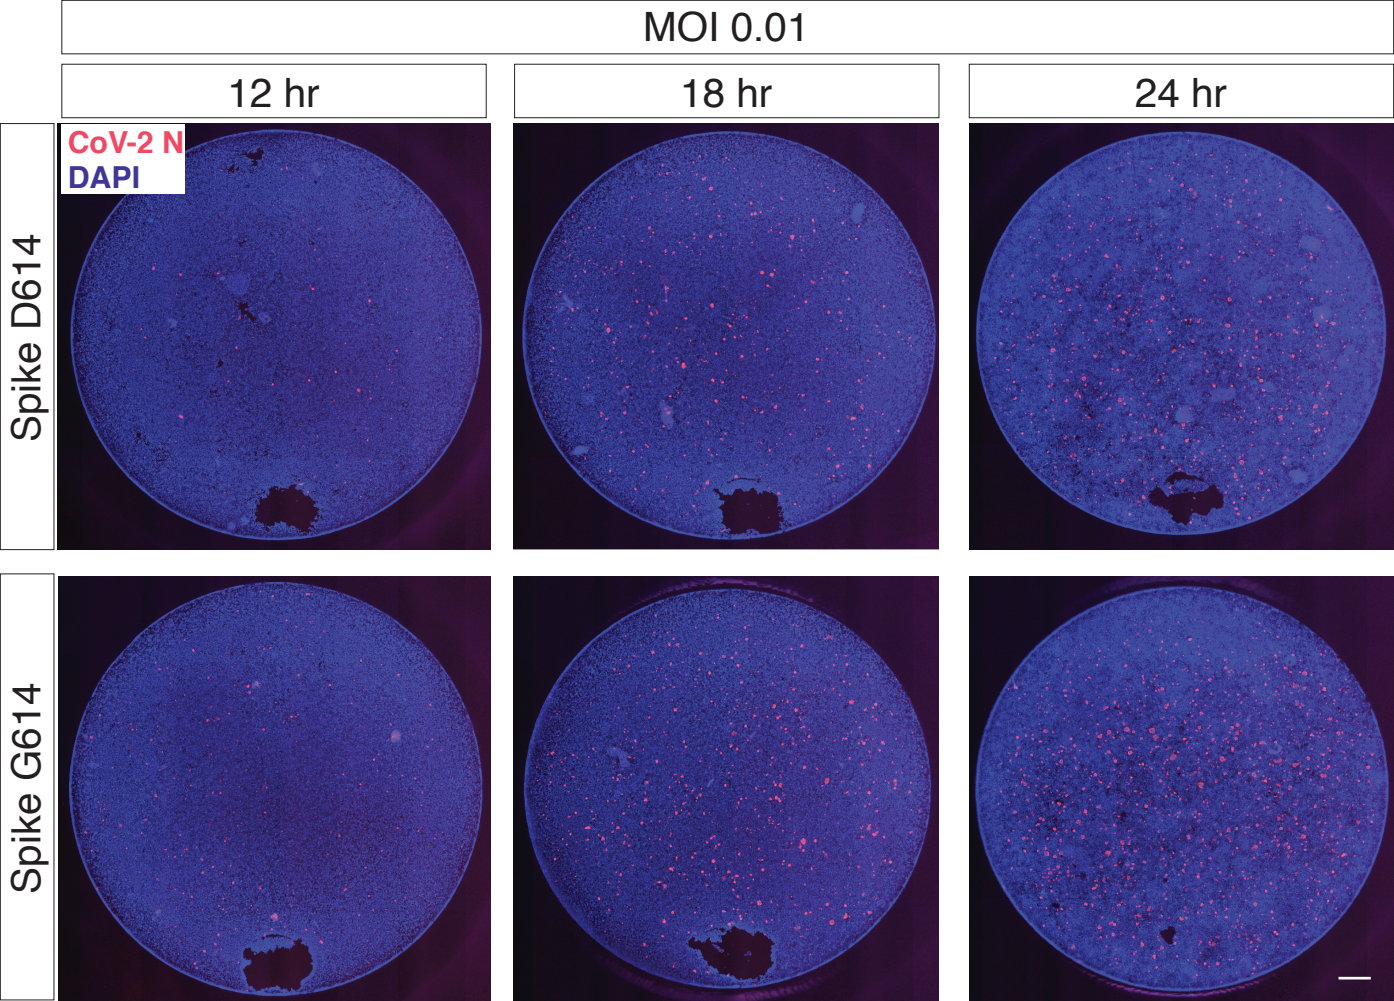

**Figure 4-figure supplement 1**

Supplement: supp [file elife-65365-supp-v1.zip]

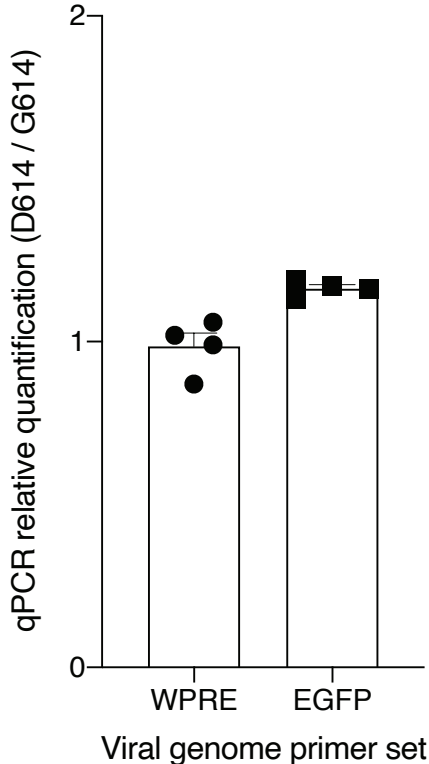

**Figure 2-figure supplement 2**

Supplement: supp [file elife-65365-supp-v1.zip]

**a**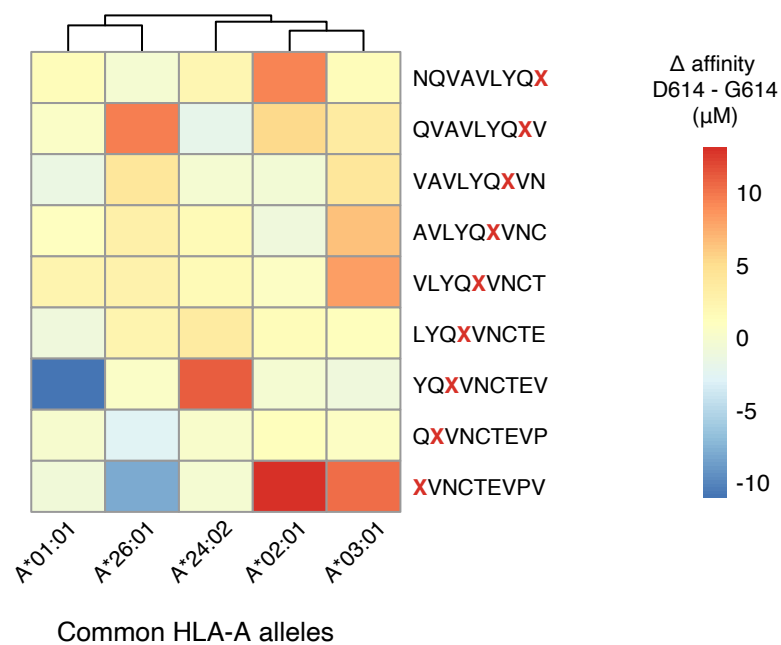**b**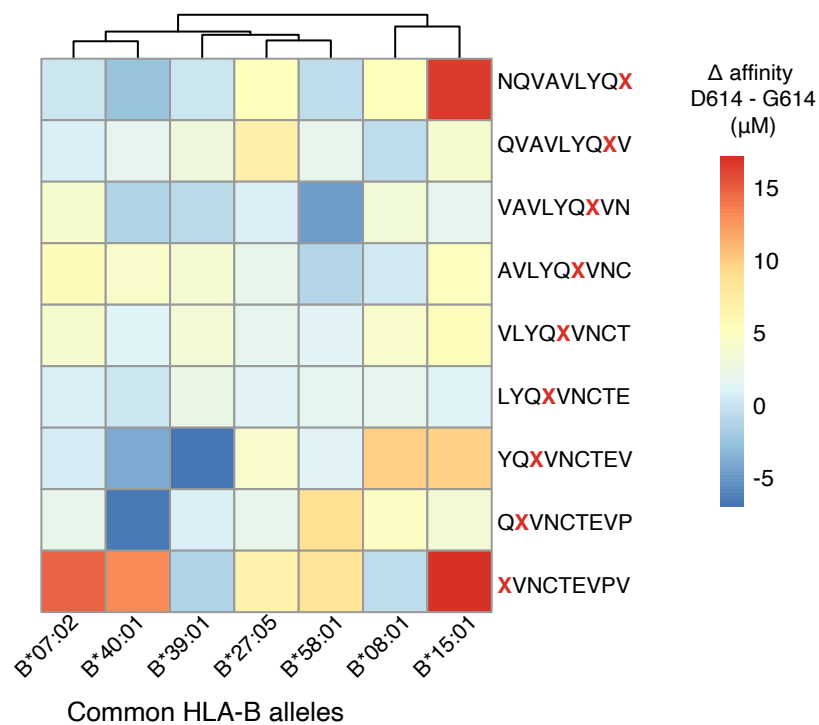**Figure 3-figure supplement 2**

Supplement: supp [file elife-65365-supp-v1.zip]

**a**

Huh7.5

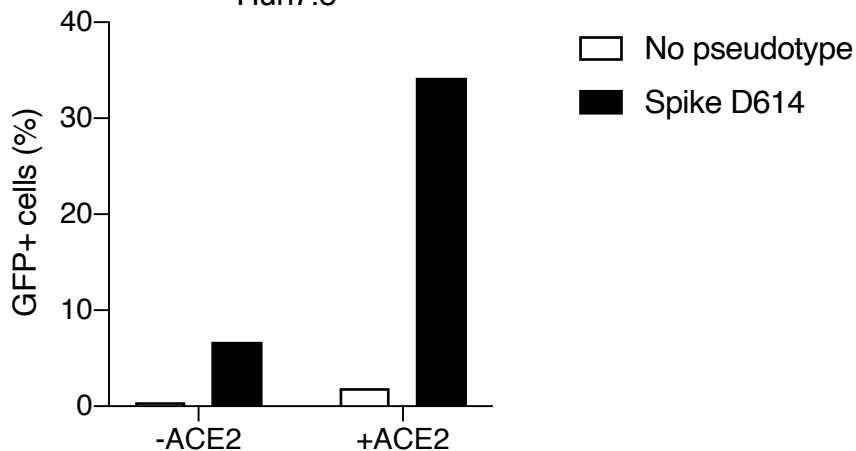**b**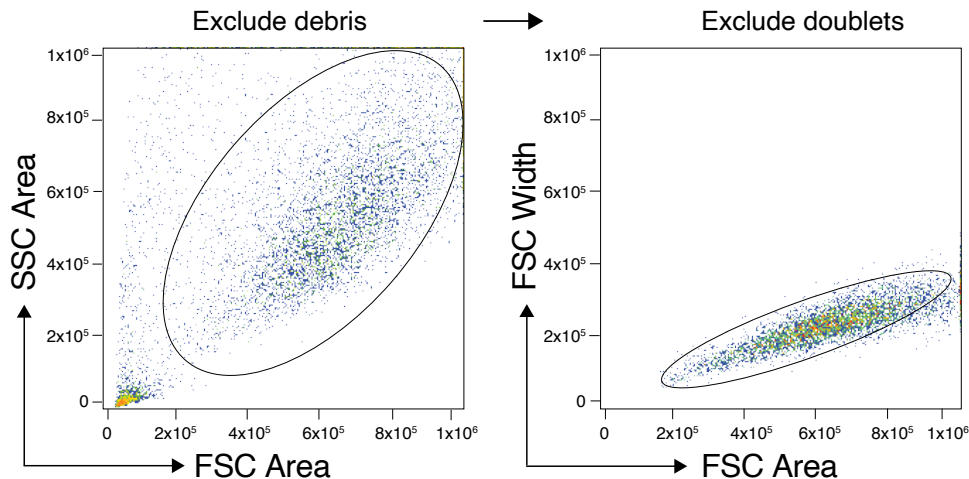**Figure 2-figure supplement 1**

Supplement: supp [file elife-65365-supp-v1.zip]
